# Supplementary material for: Global estimates of carbon stock changes in living forest biomass: EDGARv4.3 – time series from 1990 to 2010
Source: Copernicus journal article supplement (doi:10.5194/bg-9-3437-2012), 2012-08-30
Supplement: Supplementary file 1 [file bg-9-3437-2012-supplement.pdf]

1 **Supplementary Information**

2

3 Table S1: Summary of eco zones and vegetation types used for computing the forest area according to the legend  
4 of GEZ FAO map and GLC 2000 map.

| FAO GEZ map |        |                                 | GLC 2000 map                                                  |                                               |
|-------------|--------|---------------------------------|---------------------------------------------------------------|-----------------------------------------------|
| Eco zones   | Symbol | Forest type                     | Classes                                                       |                                               |
| Tropical    | TAr    | Tropical rain forest            | 1                                                             | Tree Cover, broadleaved, evergreen            |
|             | TAWa   | Tropical moist deciduous forest | 2                                                             | Tree Cover, broadleaved, deciduous, closed    |
|             | TAWb   | Tropical dry forest             | 3                                                             | Tree Cover, broadleaved, deciduous, open      |
|             | TBSh   | Tropical shrubland              | 4                                                             | Tree Cover, needle-leaved, evergreen          |
|             | TBWh   | Tropical desert                 | 5                                                             | Tree Cover, needle-leaved, deciduous          |
|             | TM     | Tropical mountain systems       | 6                                                             | Tree Cover, mixed leaf type                   |
| Subtropical | SCf    | Subtropical humid forest        |                                                               |                                               |
|             | SCs    | Subtropical dry forest          | <b>Other possible forest classes (not used in this study)</b> |                                               |
|             | SBSh   | Subtropical steppe              | 7                                                             | Tree Cover, regularly flooded, fresh water    |
|             | SBWh   | Subtropical desert              | 8                                                             | Tree Cover, regularly flooded, saline water   |
|             | SM     | Subtropical mountain systems    | 9                                                             | Mosaic: Tree Cover / Other natural vegetation |
| Temperate   | TeDo   | Temperate oceanic forest        | 11                                                            | Shrub Cover, closed-open, evergreen           |
|             | TeDc   | Temperate continental forest    | 12                                                            | Shrub Cover, closed-open, deciduous           |
|             | TeBSk  | Temperate steppe                |                                                               |                                               |
|             | TeBWk  | Temperate desert                |                                                               |                                               |
|             | TeM    | Temperate mountain systems      |                                                               |                                               |
| Boreal      | Ba     | Boreal coniferous forest        |                                                               |                                               |
|             | Bb     | Boreal tundra woodland          |                                                               |                                               |
|             | BM     | Boreal mountain systems         |                                                               |                                               |
| Polar       | P      | Polar                           |                                                               |                                               |

5

6 **S1. GPG LULUCF methodology IPCC 2003**

7

8 **GAINS**

9

10 We refer to Equations contained by the Chapter 3.2. of IPCC 2003 methodology

11 [http://www.ipcc-nggip.iges.or.jp/public/gpplulucf/gpplulucf\\_files/Chp3/Chp3\\_2\\_Forest\\_Land.pdf](http://www.ipcc-nggip.iges.or.jp/public/gpplulucf/gpplulucf_files/Chp3/Chp3_2_Forest_Land.pdf)

12 We refer to Tables contained by the Annex 3A.1 of IPCC 2003 methodology

13 [http://www.ipcc-nggip.iges.or.jp/public/gpplulucf/gpplulucf\\_files/Chp3/Anx\\_3A\\_1\\_Data\\_Tables.pdf](http://www.ipcc-nggip.iges.or.jp/public/gpplulucf/gpplulucf_files/Chp3/Anx_3A_1_Data_Tables.pdf)

14 *Step 1*

15 The year 2000 was chosen as base year for this study. The main reason was the use of GLC 2000  
16 map which was developed for this particular year to be used by countries in the FRA 2000 reporting  
17 process. The activity data was categorized as forest area (1000 ha) and each country was subdivided into  
18 spatial units (polygons) that resulted from the integration of the following data sources (layers): country,  
19 eco zones forest types and vegetation classes, using the two maps as described in paragraph 2.1.

21 *Step 2*

22 The annual average increment (i.e. growth) in biomass ( $G_{total}$ ) and was estimated using equation  
23 3.2.5 (IPCC, 2003):

$$G_{total} = G_w * (1+R) \quad (1)$$

27 where:

28  $G_{total}$  = average annual biomass increment above and below ground, t d.m.  $ha^{-1} yr^{-1}$

29  $G_w$  = average annual aboveground biomass increment, t d.m.  $ha^{-1} yr^{-1}$  Table 3A.1.5. , values for  
30 forests > 20 years

31  $R$  = root to shoot ratio appropriate to increments (ratio of below-ground biomass to above-  
32 ground biomass), dimensionless, Table 3A.1.8.

34  $G_w$  value was determined from relevant IPCC table for each forest type and climate zone for each  
35 administrative boundary of each country.

37 *Step 3*

38 Annual increase in country's C stocks due to biomass increment was calculated based on equation  
39 3.2.4. (IPCC, 2003):

$$\Delta C_{FFG} = \sum_{ij} (G_{total,ij} * A_{ij}) * CF \quad (2)$$

43  
44  
45  
46  
47  
48  
49  
50  
51  
52  
53  
54  
55  
56  
57  
58  
59  
60  
61  
62  
63  
64  
65  
66  
67  
68  
69  
70  
71  
72  
73

where:

$\Delta C_{FFG}$  = annual increase in C stocks due to biomass increment in forest land remaining forest land by forest type and climatic zones, t C yr<sup>-1</sup>

$G_{total, ij}$  = average annual biomass increment above and below ground by forest type (i = 1 to n) and climatic zone (j = 1 to m), t d.m. ha<sup>-1</sup> yr<sup>-1</sup>

$A_{ij}$  = total country area of forest land remaining forest land by forest type (i = 1 to n) and climatic zone (j = 1 to m), ha

CF = carbon fraction of dry matter (default = 0.5) t C (t d.m.)<sup>-1</sup>

#### **HARVEST**

C losses were computed for Annex I Parties same as for Non-Annex I Parties by applying the following formula:

$$\Delta C_{FFL} = H * BEF2 * D * CF \quad (3)$$

$\Delta C_{FFL}$  = annual carbon loss, t C yr<sup>-1</sup>

H = annually extracted volume,  $R_w + W_f$ , m<sup>3</sup> yr<sup>-1</sup>

$R_w$  (total) roundwood volume, m<sup>3</sup> yr<sup>-1</sup>

$W_f$  = wood fuel annual volume, m<sup>3</sup> yr<sup>-1</sup>

D = basic wood density, t d.m. m<sup>-3</sup>, Table 3A.1.9

CF = carbon fraction of dry matter (default = 0.5) t C (t d.m.)<sup>-1</sup>

BEF2 = biomass expansion factor for converting merchantable volume to total above ground biomass (including bark), dimensionless, Table 3A.1.10

The above formula is the combination of Eq. 3.2.7 and 3.2.8 where  $H = R_w + W_f$

We changed the initial Eq. 3.2.7 as following: the term 1-fBL which is the fraction of biomass left to decay in forest (transferred to dead organic matter) was not used and is assumed to be 0 when applying Tier 1 (IPCC, 2003).

74 For all countries it is assumed a high efficiency in wood use, so from one tree the harvested part is  
 75 used in industry (reported as “roundwood”) and the rest is used as wood fuel (then reported under  
 76 “wood fuel”) (INESTENE, 2011). Therefore we applied BEF2 to the total harvest volume H of wood fuel  
 77 statistics which is composed by total roundwood ( $R_w$ ) and wood fuel ( $W_f$ ) due to the entire usage of the  
 78 tree.

79

$$80 \quad \Delta C_{FFL1} = (R_w + W_f) * BEF2 * D * CF \quad (4)$$

81

82 D was used as average of all default values per eco region and forest type which is provided in the  
 83 IPCC Table 3A.1.9, while BEF2 is already provided as an average of growing stock and age. The values are  
 84 shown in Table S2.

85

86 Table S2: Mean D and BEF2 per eco region and forest type (IPCC, 2003)

| Eco region                     | Mean D | Climate zone | Forest type   | Mean BEF2 |
|--------------------------------|--------|--------------|---------------|-----------|
| Tropical Asia                  | 0.56   | Boreal       | Needle-leaved | 1.35      |
| Tropical America               | 0.60   |              | Broadleaved   | 1.3       |
| Tropical Africa                | 0.59   | Temperate    | Needle-leaved | 1.3       |
| Boreal/Temperate needle-leaved | 0.40   |              | Broadleaved   | 1.4       |
| Boreal/Temperate broadleaved   | 0.48   | Tropical     | Pines         | 1.3       |
|                                |        |              | Broadleaved   | 3.4       |

87

88 ***To convert FAO statistical roundwood data without bark into merchantable wood removals including***  
 89 ***bark, multiply by default expansion factor 1.12 (12%).***

90

91 **FIRES**

92

93 The data from GFEDv3 was used and losses due to fires were calculated based on the following formula:

94

$$95 \quad L_{ForestFires} = \text{Biomass burned} \cdot CF \quad (5)$$

96

97 Biomass burned = from GFED v3, t d.m. yr<sup>-1</sup>

98 CF = carbon fraction of dry matter as defined by van der Werf, 2010 for each partition and specie (for  
99 tropical forests 0.48 and for temperate forests 0.47 t C (t d.m.)<sup>-1</sup>

100

## 101 **NET DEFORESTATION**

102

103 The C losses due to Net Deforestation were calculated based on the stock change method as following:

104

$$105 \quad \text{LNet Deforestation} = \text{AGb}_{i,j} \cdot \text{Forest area change}_{i,j} \cdot \text{CF} \quad (6)$$

106

107  $\text{AGb}_{i,j}$  = Above-Ground Biomass stock in forest by vegetation type and climatic zone (t d.m. ha<sup>-1</sup>) (Table  
108 3A.1.2 and Table 4.7)

109 Forest area change in ha yr<sup>-1</sup> by vegetation type and climatic zone (from GEZ FAO map and GLC 2000  
110 map) as:

$$111 \quad \text{Forest area change}_{i,j} = (A_{ij2} - A_{ij1}) / n \quad (7)$$

112 n = number of years

113 i = ecological zone

114 j = climate domaine

115  $A_{ij1}$  and  $A_{ij2}$  = forest areas in two different years in time for each ecological zone and climate domain

116

117 ***Data for forest area in 1980 was not available, therefore we assumed that the % of change between***  
118 ***1980 - 1990 is equal to the one from 1990-2000.***

119

## 120 **S2. IPCC 2006 methodology**

121

### 122 **GAINS**

123

124 We refer to Equations in the Chapter 4.2.1 of IPCC2006

125 [http://www.ipcc-nggip.iges.or.jp/public/2006gl/pdf/4\\_Volume4/V4\\_04\\_Ch4\\_Forest\\_Land.pdf](http://www.ipcc-nggip.iges.or.jp/public/2006gl/pdf/4_Volume4/V4_04_Ch4_Forest_Land.pdf)

126 We refer to Tables in the Chapter 4.5 of IPCC2006

127 [http://www.ipcc-nggip.iges.or.jp/public/2006gl/pdf/4\\_Volume4/V4\\_04\\_Ch4\\_Forest\\_Land.pdf](http://www.ipcc-nggip.iges.or.jp/public/2006gl/pdf/4_Volume4/V4_04_Ch4_Forest_Land.pdf)

128

129

130 *Step 1*

131 The year 2000 was chosen as base year for this study. The main reason was the use of GLC 2000  
132 map which was developed for this particular year to be used by countries in the FRA 2000 reporting  
133 process. The activity data was categorized as forest area (1000 ha) and each country was subdivided into  
134 spatial units (polygons) that resulted from the integration of the following data sources (layers): country,  
135 eco zones forest types and vegetation classes, using the two maps as described in paragraph 2.1.

136

137 *Step 2*

138 The annual average increment (i.e. growth) in biomass ( $G_{total}$ ) and was estimated using equation  
139 2.10 (IPCC, 2006):

140

$$141 \quad G_{total} = \Sigma\{G_w \bullet (1+R)\} \quad (8)$$

142

143 where:

144  $G_{total}$  = average annual biomass increment above and below ground, t d.m.  $ha^{-1} yr^{-1}$

145  $G_w$  = average annual above-ground biomass growth for a specific woody vegetation type, t d.m.  
146  $ha^{-1} yr^{-1}$ , Table 4.9, values for forests > 20 years

147 R = root to shoot ratio appropriate to increments (ratio of below-ground biomass to above-ground  
148 biomass), dimensionless

149

150 For Tier 1 approach no change of below-ground biomass is assumed, therefore R=0

151  $G_w$  value was determined from relevant IPCC table for each forest type and climate zone for each  
152 administrative boundary of each country.

153

154 *Step 3*

155 Annual increase in country's C stocks due to biomass increment was calculated based on equation  
156 2.9 (IPCC, 2006):

157

$$158 \quad \Delta C_G = \Sigma_{ij} (G_{total,ij} * A_{ij}) * CF \quad (9)$$

159

160 where:

161  $\Delta C_G$  = annual increase in biomass carbon stocks due to biomass growth by vegetation type and  
162 climatic zone, t C yr<sup>-1</sup>

163  $G_{total, ij}$  = average annual biomass increment above and below ground by forest type (i = 1 to n) and  
164 climatic zone (j = 1 to m), t d.m. ha<sup>-1</sup> yr<sup>-1</sup>

165  $A_{ij}$  = total country area of forest land remaining forest land by forest type (i = 1 to n) and climatic  
166 zone (j = 1 to m), ha

167 CF = carbon fraction of dry matter (default CF = 0.47) t C (t d.m.)<sup>-1</sup>

168

169 ***For Tier 1 approach: no change of below-ground biomass is assumed. R=0***

170

## 171 **HARVEST**

172

173 C losses for harvest from wood removal were computed for Annex I countries same as for Non-Annex I  
174 countries by applying the Eq. 2.12 as following:

175

$$176 \quad L_{\text{wood removals}} = \{R_w \cdot BCEFr \cdot (1+ R) \cdot CF\} \quad (10)$$

177

178  $L_{\text{wood removals}}$  = annual carbon loss, t C yr<sup>-1</sup>

179  $R_w$  = annual wood removals, roundwood, m<sup>3</sup> yr<sup>-1</sup> (data from FORESTAT, 2010)

180 CF = carbon fraction of dry matter (default CF=0.47), t C (t d.m.)<sup>-1</sup>

181 BCEFr = biomass conversion and expansion factor for conversion of roundwood removals volume to  
182 total biomass removals (including bark). t d.m. m<sup>-3</sup> (Table 4.5)

183 R = root to shoot ratio appropriate to increments (ratio of below-ground biomass to above-ground  
184 biomass), dimensionless

185

186 ***For Tier 1 approach: no change of below-ground biomass is assumed. R=0***

187 ***To convert FAO statistical roundwood data without bark into merchantable wood removals including***  
188 ***bark, multiply by default expansion factor 1.15 (15%)***

189

190 The loss for C from wood fuel was calculated using the Eq. 2.13 as following:

191

$$192 \quad L_{\text{fuelwood}} = \{ \{ FG_{\text{trees}} \cdot BCEFr \cdot (1+ R) \} + FG_{\text{part}} \cdot D \} \cdot CF \quad (11)$$

193

194 Lfuelwood = annual carbon loss due to fuelwood removals, t C yr<sup>-1</sup>

195 FGtrees = annual volume of fuelwood removal of whole trees, m<sup>3</sup> yr<sup>-1</sup> (data from FORESTAT, 2010)

196 FGpart = annual volume of fuelwood removal as tree parts, m<sup>3</sup> yr<sup>-1</sup>

197 R = root to shoot ratio appropriate to increments (ratio of below-ground biomass to above-ground

198 biomass), dimensionless

199 CF = carbon fraction of dry matter, (default CF=0.47), t C (t d.m.)<sup>-1</sup>

200 D = basic wood density, t d.m. m<sup>-3</sup>

201 BCEFr = biomass conversion and expansion factor for conversion of removals in merchantable volume to

202 biomass removals (including bark), t d.m. m<sup>-3</sup> (Table 4.5)

203

204 ***For Tier 1 approach: no change of below-ground biomass is assumed. R=0***

205 ***FGpart is considered included in FGtrees according to the fuelwood Forestat definition. FGpart=0***

206

207 By combining these two formulas the total C loss dues to harvest results as:

208

$$209 \quad \text{Loss harvest} = (R_w + W_F) \cdot BCEFr \cdot CF \quad (12)$$

210

211 A comparison between BCEF and BEF2 is shown in Tab. S4.

212

### 213 **FIRES**

214

215 Same as in S1.

216

### 217 **NET DEFORESTATION**

218

219 Same as in S1.

220

221 Tab. S3. Difference between above ground biomass stock in the two IPCC guidelines. Global weighted

222 averaged values per country, climate and vegetation type (t d.m. ha<sup>-1</sup>).



| IPCC 2006    |                           |                                                                   | IPCC 2003    |                                         |                                                                   |        |
|--------------|---------------------------|-------------------------------------------------------------------|--------------|-----------------------------------------|-------------------------------------------------------------------|--------|
| Climate zone | Vegetation (forest) type  | Averaged regional above ground biomass (t d.m. ha <sup>-1</sup> ) | Climate zone | Vegetation (forest)type                 | Averaged regional above ground biomass (t d.m. ha <sup>-1</sup> ) |        |
| TROPICAL     | Tropical rain             | 308.61                                                            | TROPICAL     | Wet                                     | 335.25                                                            |        |
|              | Tropical moist deciduous  | 242.54                                                            |              | Moist with short or long dry season     | 180.52                                                            |        |
|              | Tropical desert           | 65.00                                                             |              | Dry                                     |                                                                   | 66.03  |
|              | Tropical dry              | 159.65                                                            |              |                                         |                                                                   | 71.58  |
|              | Tropical shrubland        | 66.67                                                             |              |                                         |                                                                   | 61.89  |
|              | Tropical mountain systems | 150.54                                                            |              | Mountain moist or mountain dry          | 164.21                                                            |        |
| SUBTROPICAL  | Subtropical humid         | 209.96                                                            | TROPICAL*    | Moist with short or long dry season     | 203.85                                                            |        |
|              | Subtropical dry           | 144.35                                                            |              | Dry                                     |                                                                   | 99.95  |
|              | Subtropical desert        | 70.00                                                             |              |                                         |                                                                   | 66.57  |
|              | Subtropical steppe        | 72.29                                                             |              |                                         |                                                                   | 71.20  |
|              | Subtropical mountain      | 136.08                                                            |              | Tropical mountain moist or mountain dry | 115.56                                                            |        |
| TEMPERATE    | Temperate oceanic         | 202.56                                                            | TEMPERATE    | Coniferous                              | 128.05                                                            |        |
|              | Temperate continental     | 124.64                                                            |              |                                         | 129.81                                                            |        |
|              | Temperate steppe          | 127.00                                                            |              | Broadleaf                               | 129.60                                                            |        |
|              | Temperate desert          | 130.00                                                            |              | Mixed broadleaf-coniferous              |                                                                   | 126.48 |
|              | Temperate mountain        | 129.97                                                            |              |                                         |                                                                   | 127.98 |
| BOREAL       | Boreal coniferus          | 50.00                                                             | BOREAL       | Coniferous                              | 56.73                                                             |        |
|              | Boreal tundra             | 18.00                                                             |              | Forest-tundra                           | 16.14                                                             |        |
|              | Boreal mountain           | 45.00                                                             |              | Mixed broadleaf-coniferous              | 57.22                                                             |        |
| POLAR        | Polar                     | 18.00                                                             | POLAR        | Not existing (same as for boreal)       | 49.41                                                             |        |

223

224

225

226

227

228

229

\* IPCC 2003 does not include Subtropical zone, therefore we assume that Subtropical in IPCC 2006 corresponds to Tropical in IPCC 2003 (with assumptions for each country depending on the vegetation type, see below)  
 Averaged above ground biomass values represent weighted averages per country and vegetation type for > 20yr. (taken from Tables 4.9 IPCC 2006 and 3A1.2 IPCC 2003).

Figure S1: Representation of climate zones in the two IPCC reports

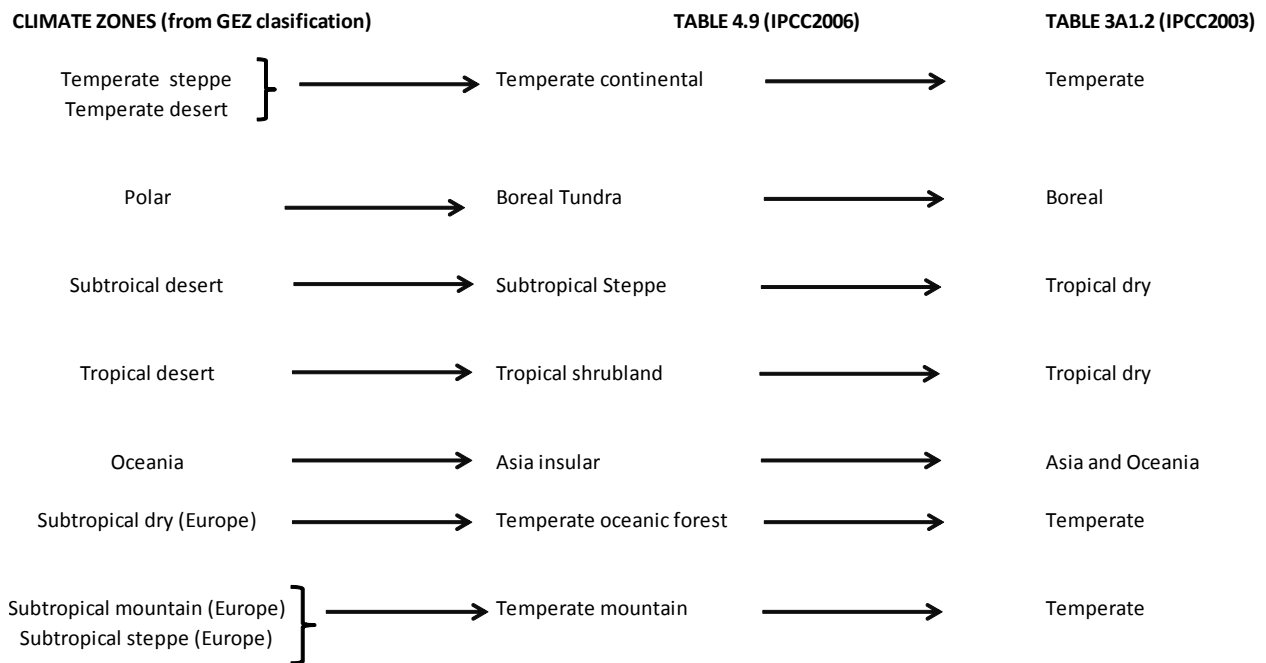

230

231 Tab. S4. Difference between BEFs factors (BEF2 and BCEF) in the two IPCC guidelines. Global averaged  
 232 values per main regions.

| Region                      | IPCC 2003                  | IPCC 2006                 | Difference |        |
|-----------------------------|----------------------------|---------------------------|------------|--------|
|                             | BEF*D (t m <sup>-3</sup> ) | BCEF (t m <sup>-3</sup> ) | Absolute   | %      |
| Africa                      | 2.01                       | 1.99                      | 0.02       | 0.77%  |
| Asia                        | 1.45                       | 2.11                      | 0.66       | 45.51% |
| Europe                      | 0.57                       | 0.92                      | 0.34       | 59.80% |
| North America               | 1.29                       | 0.85                      | 0.44       | 51.94% |
| Central America             | 2.04                       | 1.34                      | 0.70       | 51.82% |
| South America and Caribbean | 1.78                       | 1.39                      | 0.40       | 28.59% |
| Oceania                     | 1.75                       | 1.36                      | 0.40       | 29.13% |
| World                       | 1.56                       | 1.42                      | 0.13       | 9.48%  |

233 Tab. S5: Regional C stock estimates based on IPCC 2006 calculations for the four subsets: Gains, Harvest,  
 234 Fires and Net Deforestation, in Mt C yr<sup>-1</sup>

| Region                      | Gains (Mt C yr <sup>-1</sup> ) |          |          |          | Harvest (Mt C yr <sup>-1</sup> )           |         |         |         |
|-----------------------------|--------------------------------|----------|----------|----------|--------------------------------------------|---------|---------|---------|
|                             | 1990                           | 2000     | 2005     | 2010     | 1990                                       | 2000    | 2005    | 2010    |
| Africa                      | -658.87                        | -628.22  | -614.29  | -600.68  | 720.94                                     | 1109.43 | 1199.64 | 1264.92 |
| Asia                        | -568.46                        | -556.91  | -570.18  | -584.21  | 1313.19                                    | 1213.72 | 1206.75 | 1178.21 |
| Russia                      | -559.07                        | -559.29  | -558.73  | -558.95  | 118.84                                     | 76.38   | 95.40   | 87.18   |
| Europe-Russia               | -246.62                        | -257.17  | -260.65  | -264.53  | 196.22                                     | 238.01  | 266.73  | 277.56  |
| Central America             | -41.16                         | -35.54   | -33.66   | -31.80   | 49.16                                      | 55.64   | 57.98   | 59.75   |
| North America               | -691.01                        | -693.23  | -694.63  | -696.42  | 374.29                                     | 352.11  | 346.56  | 273.68  |
| South America and Caribbean | -1025.35                       | -983.26  | -950.17  | -922.17  | 255.02                                     | 292.87  | 324.19  | 337.50  |
| Oceania                     | -154.18                        | -153.21  | -151.70  | -147.81  | 20.01                                      | 24.35   | 25.40   | 25.92   |
| World                       | -3944.73                       | -3866.82 | -3834.00 | -3806.58 | 3047.67                                    | 3362.50 | 3522.65 | 3504.72 |
| Region                      | Fires (Mt C yr <sup>-1</sup> ) |          |          |          | Net Deforestation (Mt C yr <sup>-1</sup> ) |         |         |         |
|                             | 1990                           | 2000     | 2005     | 2010     | 1990                                       | 2000    | 2005    | 2010    |
| Africa                      | 152.45                         | 78.38    | 80.26    | 70.27    | 374.05                                     | 374.05  | 336.79  | 333.99  |
| Asia                        | 52.62                          | 15.12    | 10.91    | 18.06    | 348.85                                     | 348.85  | 122.06  | 154.46  |
| Russia                      | 36.33                          | 116.96   | 37.73    | 70.90    | 0.00                                       | 0.00    | 4.27    | 0.00    |
| Europe-Russia               | 12.37                          | 1.48     | 2.63     | 0.49     | 0.32                                       | 0.32    | 3.48    | 3.79    |
| Central America             | 0.82                           | 3.78     | 6.08     | 0.22     | 59.68                                      | 59.68   | 44.60   | 44.25   |
| North America               | 47.82                          | 25.34    | 93.38    | 92.15    | 32.75                                      | 32.75   | 22.24   | 14.56   |
| South America and Caribbean | 11.12                          | 19.66    | 49.20    | 37.46    | 465.13                                     | 465.13  | 698.83  | 597.28  |
| Oceania                     | 96.21                          | 7.08     | 3.78     | 2.11     | 20.80                                      | 20.80   | 29.47   | 65.11   |
| World                       | 409.74                         | 267.81   | 283.97   | 291.67   | 1301.57                                    | 1301.57 | 1261.75 | 1213.45 |

- 235 Reference
- 236 INESTENE, 2011: Rapport national d'inventaire pour la France au titre de la convention cadre des nations
- 237 unies sur les changements climatique et du protocole de Kyoto, Centre Interprofessionnel Technique
- 238 d'Etudes de la pollution Atmosphérique CITEPA/rapport CCNUCC – edition de mars 2011.
